# Supplementary material for: Facile synthesis of two-dimensional graphene/SnO2/Pt ternary hybrid nanomaterials and their catalytic properties
Source: Royal Society of Chemistry journal article supplement (doi:10.1039/c1nr10634a), 2011-01-01
Supplement: c1nr10634a.pdf [file c1nr10634a.pdf]

## Supplementary Information

### Facile synthesis of two-dimensional graphene/SnO<sub>2</sub>/Pt ternary hybrid nanomaterials and their catalytic properties

Chengzhou Zhu, Ping Wang, Li Wang, Lei Han and Shaojun Dong

State Key Laboratory of Electroanalytical Chemistry, Changchun Institute of Applied Chemistry, Chinese Academy of Sciences, Changchun 130022, China, and Graduate School of the Chinese Academy of Sciences, Beijing, 100039, China

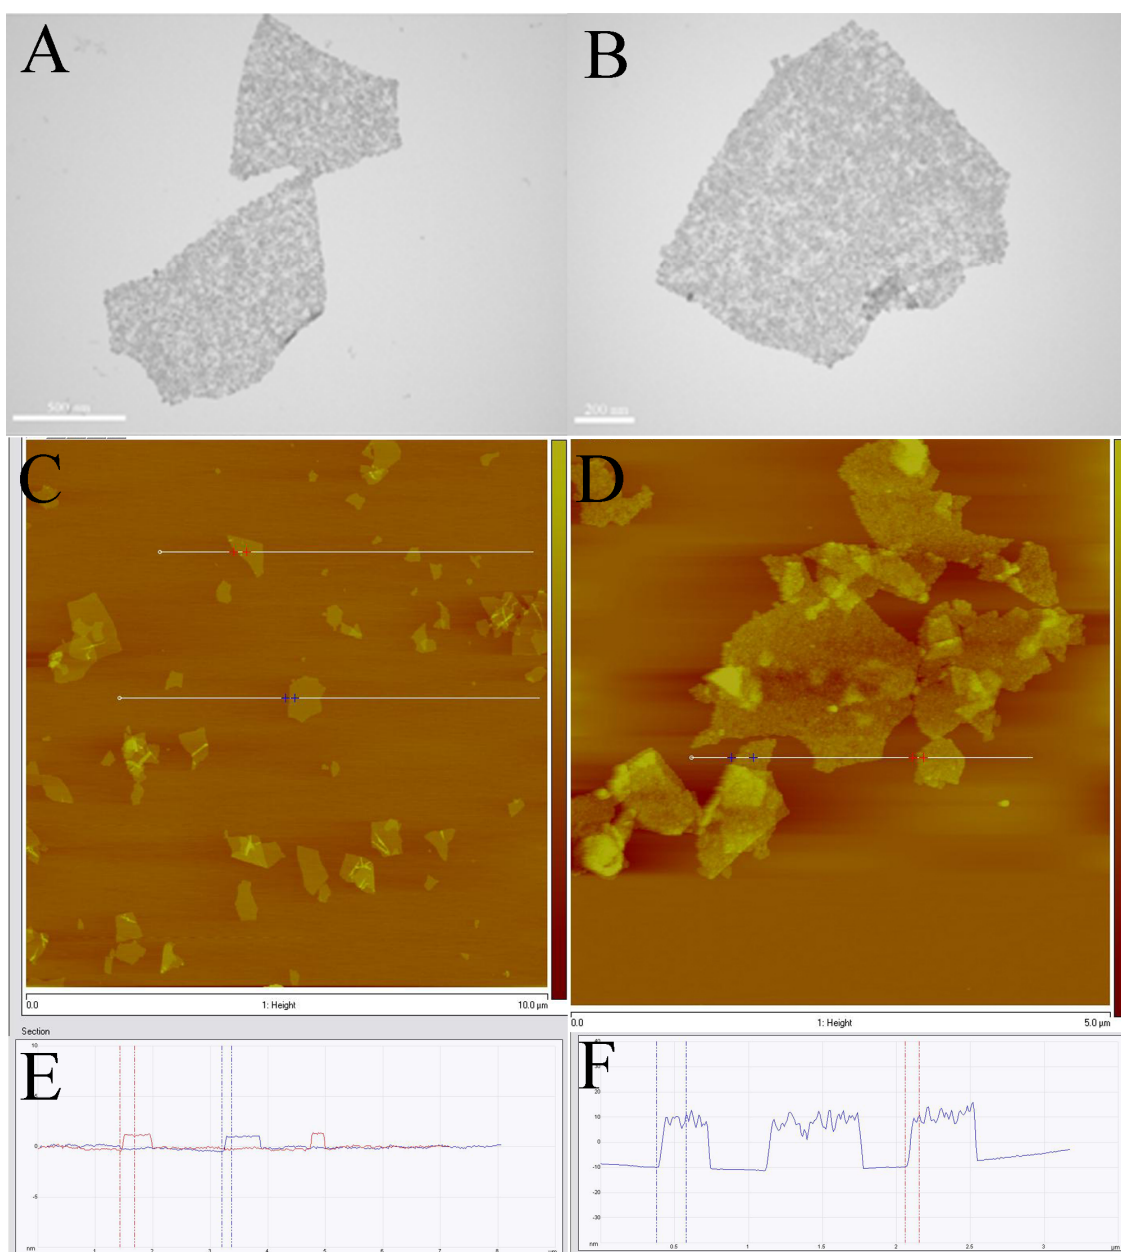

Fig. S1 (A,B) TEM image of the two-dimensional GSCN. AFM images (C, D) and height profiles (E, F) along the lines shown in AFM images of GO (C, E) and as-prepared GSCN (D, F).

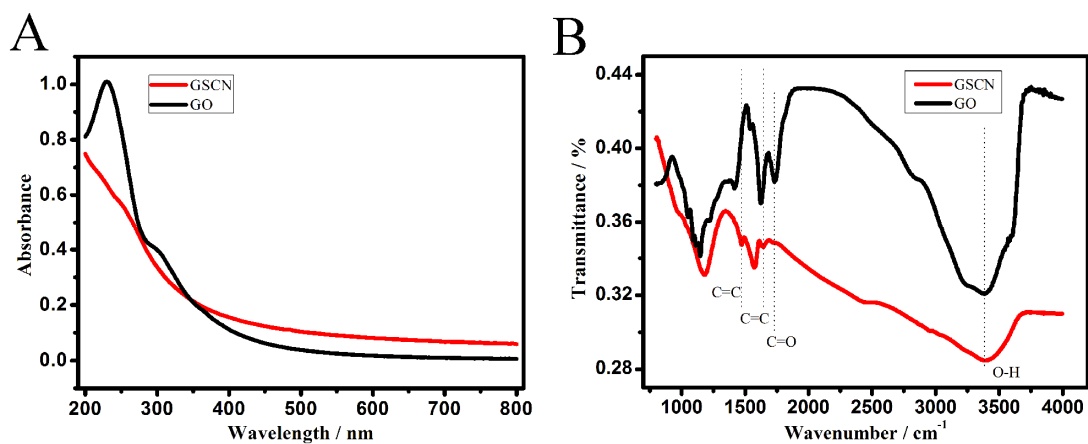

Fig. S2 UV-vis absorption (A) and FTIR (B) spectra of GO and the obtained GSCN.

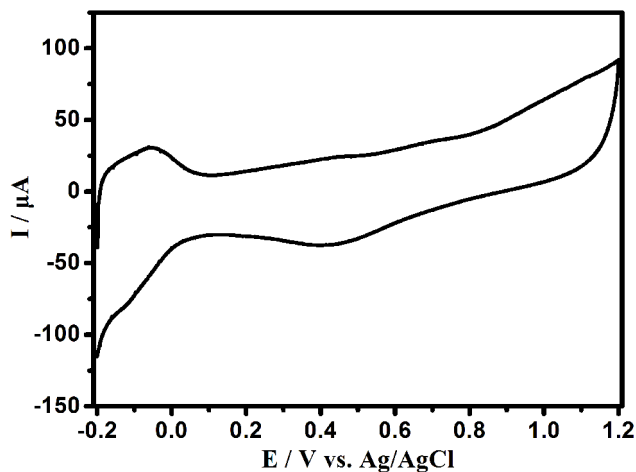

Fig. S3 A typical cyclic voltammogram obtained at GSCN/Pt/GCE in 0.5 M H<sub>2</sub>SO<sub>4</sub> electrolyte saturated with nitrogen at a scan rate of 50 mV/s.
